# Supplementary material for: Evaluation of Different Adiposity Indices and Association with Metabolic Syndrome Risk in Obese Children: Is there a Winner?
Source: PubMed Central journal article supplement (PMC7313019; doi:10.3390/ijms21114083), 2020-06-08
Supplement: ijms-21-04083-s001.pdf [file ijms-21-04083-s001.pdf]

**Table 1S: Association of anthropometric indexes with the risk of high blood pressure**

|                       | Children <10y              |                          |                           |                        |                           | Children ≥10y               |                           |                            |                        |                            |
|-----------------------|----------------------------|--------------------------|---------------------------|------------------------|---------------------------|-----------------------------|---------------------------|----------------------------|------------------------|----------------------------|
|                       | BMIz                       | ABSIz                    | TMI                       | C-Index                | WHR                       | BMIz                        | ABSIz                     | TMI                        | C-Index                | WHR                        |
| Sex (Male)            | -0.03<br>[-1.19,1.13]      | 0.39<br>[-0.66,1.45]     | 0.22<br>[-0.89,1.33]      | 0.36<br>[-0.69,1.42]   | 0.26<br>[-0.83,1.35]      | 0.16<br>[-0.48,0.81]        | 0.68<br>[-0.04,1.39]      | 0.79*<br>[0.13,1.45]       | 0.52<br>[-0.18,1.22]   | 0.46<br>[-0.15,1.07]       |
| Age (years)           | 0.96*<br>[0.13,1.80]       | 0.71<br>[-0.09,1.51]     | 0.73<br>[-0.08,1.53]      | 0.69<br>[-0.11,1.49]   | 0.66<br>[-0.13,1.46]      | 0.29***<br>[0.18,0.41]      | 0.27***<br>[0.15,0.39]    | 0.23***<br>[0.11,0.35]     | 0.26***<br>[0.14,0.38] | 0.25***<br>[0.13,0.36]     |
| BMI z-score (CDC)     | 3.34**<br>[1.08,5.59]      |                          |                           |                        |                           | 2.55***<br>[1.37,3.73]      |                           |                            |                        |                            |
| ABSI z-score          |                            | -0.19<br>[-0.72,0.34]    |                           |                        |                           |                             | -0.35<br>[-0.75,0.05]     |                            |                        |                            |
| Total mass index      |                            |                          | 0.27<br>[-0.02,0.56]      |                        |                           |                             |                           | 0.19***<br>[0.08,0.31]     |                        |                            |
| C-index               |                            |                          |                           | 0.85<br>[-6.46,8.16]   |                           |                             |                           |                            | -1.44<br>[-6.66,3.77]  |                            |
| Waist-to-Height ratio |                            |                          |                           |                        | 7.15<br>[-4.12,18.43]     |                             |                           |                            |                        | 5.07<br>[-0.76,10.89]      |
| Constant              | -17.02**<br>[-27.46,-6.58] | -7.47*<br>[-14.71,-0.24] | -12.66*<br>[-22.52,-2.80] | -8.48<br>[-20.56,3.60] | -11.40*<br>[-21.85,-0.95] | -11.30***<br>[-14.33,-8.26] | -5.79***<br>[-7.85,-3.74] | -9.03***<br>[-11.76,-6.30] | -3.81<br>[-9.89,2.27]  | -8.39***<br>[-11.81,-4.97] |
| Observations          | 84                         | 84                       | 84                        | 84                     | 84                        | 319                         | 319                       | 319                        | 319                    | 319                        |
| Pseudo R <sup>2</sup> | 0.124                      | 0.042                    | 0.073                     | 0.038                  | 0.054                     | 0.138                       | 0.090                     | 0.109                      | 0.077                  | 0.087                      |
| AIC                   | 93                         | 101                      | 98                        | 101                    | 99                        | 269                         | 283                       | 277                        | 287                    | 284                        |

|                       | Female ≥10y                 |                          |                            |                        |                            | Male ≥10y                   |                            |                             |                        |                            |
|-----------------------|-----------------------------|--------------------------|----------------------------|------------------------|----------------------------|-----------------------------|----------------------------|-----------------------------|------------------------|----------------------------|
|                       | BMIz                        | ABSIz                    | TMI                        | C-Index                | WHR                        | BMIz                        | ABSIz                      | TMI                         | C-Index                | WHR                        |
| Age (years)           | 0.21**<br>[0.05,0.37]       | 0.14<br>[-0.01,0.29]     | 0.06<br>[-0.10,0.22]       | 0.14<br>[-0.01,0.29]   | 0.11<br>[-0.05,0.27]       | 0.40***<br>[0.21,0.59]      | 0.43***<br>[0.24,0.62]     | 0.40***<br>[0.21,0.59]      | 0.39***<br>[0.20,0.58] | 0.39***<br>[0.20,0.58]     |
| BMI z-score (CDC)     | 3.08***<br>[1.26,4.90]      |                          |                            |                        |                            | 2.05**<br>[0.50,3.61]       |                            |                             |                        |                            |
| ABSI z-score          |                             | -0.15<br>[-0.70,0.41]    |                            |                        |                            |                             | -0.62*<br>[-1.14,-0.09]    |                             |                        |                            |
| Total mass index      |                             |                          | 0.22**<br>[0.05,0.38]      |                        |                            |                             |                            | 0.24**<br>[0.08,0.40]       |                        |                            |
| C-index               |                             |                          |                            | 0.84<br>[-6.41,8.09]   |                            |                             |                            |                             | -4.07<br>[-10.56,2.42] |                            |
| Waist-to-Height ratio |                             |                          |                            |                        | 7.11<br>[-1.06,15.28]      |                             |                            |                             |                        | 4.56<br>[-3.46,12.59]      |
| Constant              | -11.17***<br>[-16.24,-6.10] | -3.81**<br>[-6.15,-1.47] | -7.02***<br>[-10.32,-3.72] | -4.82<br>[-13.16,3.51] | -7.53***<br>[-12.01,-3.06] | -11.65***<br>[-15.56,-7.73] | -7.44***<br>[-10.44,-4.44] | -11.84***<br>[-15.97,-7.71] | -1.99<br>[-10.72,6.74] | -9.84***<br>[-15.16,-4.53] |
| Observations          | 169                         | 169                      | 169                        | 169                    | 169                        | 150                         | 150                        | 150                         | 150                    | 150                        |
| Pseudo R <sup>2</sup> | 0.099                       | 0.025                    | 0.067                      | 0.023                  | 0.046                      | 0.186                       | 0.182                      | 0.187                       | 0.151                  | 0.149                      |
| AIC                   | 137                         | 147                      | 141                        | 148                    | 144                        | 133                         | 133                        | 132                         | 138                    | 138                        |

Values are regression coefficients and 95% confidence intervals obtained from logistic regression models adjusted for sex and age

Abbreviations:

\*p<0.05 \*\*p<0.01 \*\*\*p<0.001

**Table 1S: Association of anthropometric indexes with the risk of impaired fasting glucose**

|                       | Children <10y          |                       |                        |                         |                         | Children ≥10y             |                           |                         |                       |                        |
|-----------------------|------------------------|-----------------------|------------------------|-------------------------|-------------------------|---------------------------|---------------------------|-------------------------|-----------------------|------------------------|
|                       | BMIz                   | ABSIz                 | TMI                    | C-Index                 | WHR                     | BMIz                      | ABSIz                     | TMI                     | C-Index               | WHR                    |
| Sex (Male)            | -0.65<br>[-2.69,1.40]  | -0.46<br>[-2.74,1.82] | -0.58<br>[-2.81,1.65]  | -0.43<br>[-2.46,1.60]   | -0.50<br>[-2.43,1.42]   | 0.68<br>[-0.13,1.49]      | 0.85<br>[-0.02,1.72]      | 0.63<br>[-0.21,1.48]    | 0.88<br>[-0.00,1.77]  | 0.70<br>[-0.11,1.50]   |
| Age (years)           | 0.04<br>[-0.74,0.82]   | 0.00<br>[-0.74,0.75]  | -0.02<br>[-0.75,0.70]  | 0.01<br>[-0.78,0.81]    | -0.03<br>[-0.78,0.73]   | 0.21**<br>[0.06,0.37]     | 0.22**<br>[0.07,0.37]     | 0.22**<br>[0.08,0.37]   | 0.22**<br>[0.06,0.37] | 0.23**<br>[0.08,0.37]  |
| BMI z-score (CDC)     | 1.10<br>[-2.37,4.57]   |                       |                        |                         |                         | 0.22<br>[-1.18,1.62]      |                           |                         |                       |                        |
| ABSI z-score          |                        | -0.31<br>[-1.44,0.82] |                        |                         |                         |                           | -0.22<br>[-0.69,0.25]     |                         |                       |                        |
| Total mass index      |                        |                       | 0.13<br>[-0.32,0.57]   |                         |                         |                           |                           | -0.04<br>[-0.20,0.11]   |                       |                        |
| C-index               |                        |                       |                        | -2.67<br>[-22.15,16.81] |                         |                           |                           |                         | -3.44<br>[-9.78,2.91] |                        |
| Waist-to-Height ratio |                        |                       |                        |                         | 1.18<br>[-25.98,28.35]  |                           |                           |                         |                       | -3.94<br>[-11.34,3.47] |
| Constant              | -5.54<br>[-17.91,6.82] | -2.72<br>[-9.26,3.83] | -4.94<br>[-17.35,7.48] | 0.40<br>[-23.22,24.01]  | -3.32<br>[-20.00,13.35] | -6.29**<br>[-10.53,-2.04] | -5.96***<br>[-8.46,-3.46] | -5.13*<br>[-9.18,-1.07] | -1.69<br>[-9.99,6.62] | -3.71<br>[-8.90,1.49]  |
| Observations          | 84                     | 84                    | 84                     | 84                      | 84                      | 319                       | 319                       | 319                     | 319                   | 319                    |
| Pseudo R <sup>2</sup> | 0.013                  | 0.014                 | 0.011                  | 0.009                   | 0.006                   | 0.057                     | 0.062                     | 0.058                   | 0.063                 | 0.062                  |
| AIC                   | 40                     | 40                    | 40                     | 40                      | 40                      | 191                       | 190                       | 191                     | 190                   | 190                    |

|                       | Female ≥10y            |                          |                        |                         |                        | Male ≥10y                |                           |                        |                         |                        |
|-----------------------|------------------------|--------------------------|------------------------|-------------------------|------------------------|--------------------------|---------------------------|------------------------|-------------------------|------------------------|
|                       | BMIz                   | ABSIz                    | TMI                    | C-Index                 | WHR                    | BMIz                     | ABSIz                     | TMI                    | C-Index                 | WHR                    |
| Age (years)           | 0.15<br>[-0.10,0.39]   | 0.15<br>[-0.09,0.39]     | 0.16<br>[-0.06,0.38]   | 0.15<br>[-0.09,0.39]    | 0.17<br>[-0.05,0.39]   | 0.26*<br>[0.06,0.46]     | 0.27**<br>[0.07,0.47]     | 0.26**<br>[0.07,0.46]  | 0.26*<br>[0.06,0.46]    | 0.27**<br>[0.07,0.47]  |
| BMI z-score (CDC)     | -0.25<br>[-2.46,1.95]  |                          |                        |                         |                        | 0.35<br>[-1.44,2.13]     |                           |                        |                         |                        |
| ABSI z-score          |                        | -0.22<br>[-0.94,0.50]    |                        |                         |                        |                          | -0.23<br>[-0.86,0.39]     |                        |                         |                        |
| Total mass index      |                        |                          | -0.02<br>[-0.24,0.20]  |                         |                        |                          |                           | -0.04<br>[-0.26,0.18]  |                         |                        |
| C-index               |                        |                          |                        | -2.66<br>[-11.96,6.64]  |                        |                          |                           |                        | -3.93<br>[-12.48,4.62]  |                        |
| Waist-to-Height ratio |                        |                          |                        |                         | -3.06<br>[-12.82,6.71] |                          |                           |                        |                         | -4.09<br>[-14.82,6.63] |
| Constant              | -4.29<br>[-11.16,2.59] | -4.90**<br>[-8.55,-1.25] | -4.56<br>[-10.12,0.99] | -1.65<br>[-14.07,10.77] | -3.33<br>[-10.50,3.84] | -6.57*<br>[-11.96,-1.17] | -5.90***<br>[-9.00,-2.79] | -5.18<br>[-10.56,0.20] | -0.89<br>[-12.48,10.70] | -3.54<br>[-10.88,3.81] |
| Observations          | 169                    | 169                      | 169                    | 169                     | 169                    | 150                      | 150                       | 150                    | 150                     | 150                    |
| Pseudo R <sup>2</sup> | 0.021                  | 0.026                    | 0.021                  | 0.025                   | 0.024                  | 0.064                    | 0.069                     | 0.064                  | 0.072                   | 0.068                  |
| AIC                   | 86                     | 85                       | 86                     | 85                      | 85                     | 109                      | 109                       | 109                    | 108                     | 109                    |

Values are regression coefficients and 95% confidence intervals obtained from logistic regression models adjusted for sex and age

Abbreviations:

\*p<0.05 \*\*p<0.01 \*\*\*p<0.001

**Table 1S: Association of anthropometric indexes with the risk of high triglycerides**

|                       | Children <10y          |                        |                        |                        |                        | Children ≥10y            |                         |                         |                             |                            |
|-----------------------|------------------------|------------------------|------------------------|------------------------|------------------------|--------------------------|-------------------------|-------------------------|-----------------------------|----------------------------|
|                       | BMIz                   | ABSIz                  | TMI                    | C-Index                | WHR                    | BMIz                     | ABSIz                   | TMI                     | C-Index                     | WHR                        |
| Sex (Male)            | 0.07<br>[-0.93,1.06]   | 0.05<br>[-0.92,1.01]   | 0.12<br>[-0.86,1.10]   | 0.01<br>[-0.96,0.98]   | 0.06<br>[-0.92,1.03]   | 0.18<br>[-0.46,0.82]     | -0.05<br>[-0.72,0.62]   | 0.40<br>[-0.28,1.07]    | -0.16<br>[-0.85,0.52]       | 0.29<br>[-0.36,0.94]       |
| Age (years)           | 0.52<br>[-0.19,1.22]   | 0.51<br>[-0.22,1.24]   | 0.52<br>[-0.23,1.28]   | 0.49<br>[-0.23,1.20]   | 0.52<br>[-0.21,1.24]   | 0.03<br>[-0.11,0.16]     | 0.02<br>[-0.11,0.15]    | 0.01<br>[-0.13,0.14]    | 0.03<br>[-0.10,0.16]        | -0.01<br>[-0.14,0.13]      |
| BMI z-score (CDC)     | -0.06<br>[-2.16,2.05]  |                        |                        |                        |                        | 1.17<br>[-0.04,2.38]     |                         |                         |                             |                            |
| ABSI z-score          | 0.21<br>[-0.29,0.71]   |                        |                        |                        |                        | 0.67***<br>[0.29,1.04]   |                         |                         |                             |                            |
| Total mass index      | -0.10<br>[-0.42,0.23]  |                        |                        |                        |                        | 0.07<br>[-0.05,0.19]     |                         |                         |                             |                            |
| C-index               | 2.91<br>[-4.08,9.89]   |                        |                        |                        |                        | 10.61***<br>[4.92,16.31] |                         |                         |                             |                            |
| Waist-to-Height ratio | 0.11<br>[-9.86,10.09]  |                        |                        |                        |                        | 9.34**<br>[3.69,15.00]   |                         |                         |                             |                            |
| Constant              | -5.06<br>[-12.53,2.40] | -5.25<br>[-11.79,1.28] | -3.51<br>[-11.15,4.14] | -8.62<br>[-19.00,1.77] | -5.27<br>[-13.00,2.46] | -4.70**<br>[-7.98,-1.41] | -2.28*<br>[-4.22,-0.34] | -3.47*<br>[-6.41,-0.53] | -15.52***<br>[-22.90,-8.14] | -7.51***<br>[-11.24,-3.77] |
| Observations          | 84                     | 84                     | 84                     | 84                     | 84                     | 319                      | 319                     | 319                     | 319                         | 319                        |
| Pseudo R <sup>2</sup> | 0.020                  | 0.026                  | 0.024                  | 0.026                  | 0.020                  | 0.018                    | 0.056                   | 0.008                   | 0.070                       | 0.043                      |
| AIC                   | 116                    | 116                    | 116                    | 116                    | 116                    | 263                      | 253                     | 265                     | 249                         | 256                        |

|                       | Female ≥10y             |                       |                       |                            |                           | Male ≥10y                 |                         |                         |                           |                           |
|-----------------------|-------------------------|-----------------------|-----------------------|----------------------------|---------------------------|---------------------------|-------------------------|-------------------------|---------------------------|---------------------------|
|                       | BMIz                    | ABSIz                 | TMI                   | C-Index                    | WHR                       | BMIz                      | ABSIz                   | TMI                     | C-Index                   | WHR                       |
| Age (years)           | -0.05<br>[-0.26,0.15]   | -0.03<br>[-0.23,0.17] | -0.08<br>[-0.30,0.14] | -0.04<br>[-0.24,0.16]      | -0.11<br>[-0.32,0.10]     | 0.09<br>[-0.09,0.26]      | 0.08<br>[-0.10,0.26]    | 0.09<br>[-0.08,0.27]    | 0.09<br>[-0.08,0.27]      | 0.09<br>[-0.08,0.27]      |
| BMI z-score (CDC)     | 0.57<br>[-1.43,2.56]    |                       |                       |                            |                           | 1.46<br>[-0.05,2.97]      |                         |                         |                           |                           |
| ABSI z-score          | 0.81**<br>[0.28,1.34]   |                       |                       |                            |                           | 0.46<br>[-0.04,0.96]      |                         |                         |                           |                           |
| Total mass index      | 0.05<br>[-0.13,0.23]    |                       |                       |                            |                           | 0.13<br>[-0.04,0.30]      |                         |                         |                           |                           |
| C-index               | 11.75**<br>[4.29,19.21] |                       |                       |                            |                           | 8.80*<br>[0.23,17.38]     |                         |                         |                           |                           |
| Waist-to-Height ratio | 10.15*<br>[1.97,18.33]  |                       |                       |                            |                           | 9.69*<br>[1.49,17.89]     |                         |                         |                           |                           |
| Constant              | -2.38<br>[-7.57,2.80]   | -1.64<br>[-4.49,1.22] | -1.82<br>[-5.49,1.84] | -16.02**<br>[-25.91,-6.14] | -6.51**<br>[-11.34,-1.67] | -6.01**<br>[-10.22,-1.79] | -3.05*<br>[-5.69,-0.41] | -5.43*<br>[-9.96,-0.90] | -14.33*<br>[-25.58,-3.08] | -8.84**<br>[-14.70,-2.97] |
| Observations          | 169                     | 169                   | 169                   | 169                        | 169                       | 150                       | 150                     | 150                     | 150                       | 150                       |
| Pseudo R <sup>2</sup> | 0.006                   | 0.088                 | 0.005                 | 0.098                      | 0.051                     | 0.034                     | 0.032                   | 0.024                   | 0.048                     | 0.049                     |
| AIC                   | 132                     | 122                   | 132                   | 120                        | 126                       | 133                       | 134                     | 135                     | 132                       | 131                       |

Values are regression coefficients and 95% confidence intervals obtained from logistic regression models adjusted for sex and age

Abbreviations:

\*p<0.05 \*\*p<0.01 \*\*\*p<0.001

**Table 1S: Association of anthropometric indexes with the risk of low HDL cholesterol**

|                       | Children <10y          |                       |                        |                        |                        | Children ≥10y         |                         |                       |                          |                         |
|-----------------------|------------------------|-----------------------|------------------------|------------------------|------------------------|-----------------------|-------------------------|-----------------------|--------------------------|-------------------------|
|                       | BMIz                   | ABSIz                 | TMI                    | C-Index                | WHR                    | BMIz                  | ABSIz                   | TMI                   | C-Index                  | WHR                     |
| Sex (Male)            | -0.37<br>[-1.54,0.81]  | -0.07<br>[-1.18,1.04] | -0.27<br>[-1.37,0.84]  | -0.15<br>[-1.26,0.96]  | -0.29<br>[-1.37,0.80]  | -0.22<br>[-0.70,0.27] | -0.32<br>[-0.85,0.21]   | -0.19<br>[-0.73,0.35] | -0.37<br>[-0.91,0.16]    | -0.21<br>[-0.71,0.28]   |
| Age (years)           | 0.04<br>[-0.67,0.74]   | -0.10<br>[-0.88,0.68] | -0.08<br>[-0.79,0.62]  | -0.15<br>[-0.94,0.63]  | -0.16<br>[-0.91,0.59]  | 0.06<br>[-0.03,0.15]  | 0.06<br>[-0.03,0.15]    | 0.06<br>[-0.04,0.15]  | 0.06<br>[-0.03,0.15]     | 0.05<br>[-0.04,0.14]    |
| BMI z-score (CDC)     | 1.95<br>[-0.70,4.59]   |                       |                        |                        |                        | 0.12<br>[-0.86,1.09]  |                         |                       |                          |                         |
| ABSI z-score          |                        | 0.14<br>[-0.49,0.77]  |                        |                        |                        |                       | 0.19<br>[-0.09,0.47]    |                       |                          |                         |
| Total mass index      |                        |                       | 0.24<br>[-0.09,0.57]   |                        |                        |                       |                         | 0.01<br>[-0.10,0.12]  |                          |                         |
| C-index               |                        |                       |                        | 4.71<br>[-4.00,13.41]  |                        |                       |                         |                       | 3.36<br>[-0.62,7.33]     |                         |
| Waist-to-Height ratio |                        |                       |                        |                        | 9.96<br>[-2.79,22.70]  |                       |                         |                       |                          | 2.94<br>[-1.90,7.77]    |
| Constant              | -5.76<br>[-14.77,3.26] | -0.44<br>[-7.39,6.52] | -4.85<br>[-13.44,3.73] | -5.89<br>[-18.12,6.35] | -5.74<br>[-14.62,3.15] | -1.95<br>[-4.37,0.47] | -1.69*<br>[-3.04,-0.33] | -1.90<br>[-4.24,0.43] | -5.86*<br>[-10.96,-0.77] | -3.32*<br>[-6.31,-0.33] |
| Observations          | 84                     | 84                    | 84                     | 84                     | 84                     | 319                   | 319                     | 319                   | 319                      | 319                     |
| Pseudo R <sup>2</sup> | 0.033                  | 0.003                 | 0.029                  | 0.014                  | 0.031                  | 0.006                 | 0.011                   | 0.006                 | 0.015                    | 0.010                   |
| AIC                   | 92                     | 95                    | 93                     | 94                     | 93                     | 385                   | 383                     | 385                   | 382                      | 384                     |

  

|                       | Female ≥10y           |                         |                       |                          |                       | Male ≥10y                |                       |                         |                        |                          |
|-----------------------|-----------------------|-------------------------|-----------------------|--------------------------|-----------------------|--------------------------|-----------------------|-------------------------|------------------------|--------------------------|
|                       | BMIz                  | ABSIz                   | TMI                   | C-Index                  | WHR                   | BMIz                     | ABSIz                 | TMI                     | C-Index                | WHR                      |
| Age (years)           | 0.07<br>[-0.07,0.20]  | 0.10<br>[-0.04,0.23]    | 0.13<br>[-0.01,0.27]  | 0.09<br>[-0.04,0.22]     | 0.09<br>[-0.05,0.22]  | 0.02<br>[-0.11,0.15]     | 0.03<br>[-0.10,0.15]  | 0.03<br>[-0.10,0.15]    | 0.03<br>[-0.10,0.15]   | 0.02<br>[-0.10,0.15]     |
| BMI z-score (CDC)     | -1.41<br>[-2.85,0.03] |                         |                       |                          |                       | 1.45*<br>[0.07,2.83]     |                       |                         |                        |                          |
| ABSI z-score          |                       | 0.32<br>[-0.05,0.69]    |                       |                          |                       |                          | 0.01<br>[-0.42,0.45]  |                         |                        |                          |
| Total mass index      |                       |                         | -0.12<br>[-0.27,0.04] |                          |                       |                          |                       | 0.15<br>[-0.01,0.30]    |                        |                          |
| C-index               |                       |                         |                       | 3.71<br>[-1.22,8.65]     |                       |                          |                       |                         | 2.85<br>[-3.96,9.65]   |                          |
| Waist-to-Height ratio |                       |                         |                       |                          | -0.03<br>[-6.04,5.99] |                          |                       |                         |                        | 6.62<br>[-1.11,14.36]    |
| Constant              | 1.03<br>[-2.65,4.70]  | -2.19*<br>[-4.12,-0.26] | -0.38<br>[-3.38,2.62] | -6.70*<br>[-13.24,-0.16] | -2.07<br>[-5.79,1.65] | -4.38**<br>[-7.61,-1.14] | -1.42<br>[-3.22,0.39] | -4.14*<br>[-7.37,-0.91] | -5.06<br>[-13.75,3.63] | -5.35*<br>[-10.11,-0.60] |
| Observations          | 169                   | 169                     | 169                   | 169                      | 169                   | 150                      | 150                   | 150                     | 150                    | 150                      |
| Pseudo R <sup>2</sup> | 0.026                 | 0.025                   | 0.021                 | 0.021                    | 0.009                 | 0.028                    | 0.001                 | 0.021                   | 0.006                  | 0.021                    |
| AIC                   | 208                   | 208                     | 209                   | 209                      | 211                   | 173                      | 178                   | 174                     | 177                    | 174                      |

Values are regression coefficients and 95% confidence intervals obtained from logistic regression models adjusted for sex and age

Abbreviations:

\*p<0.05 \*\*p<0.01 \*\*\*p<0.001
